# Supplementary material for: Preparation, crystal structure and solution-mediated phase transformation of a novel solid-state form of CL-20
Source: Royal Society of Chemistry journal article supplement (doi:10.1039/c7ce02026k), 2018-01-01
Supplement: c7ce02026k1.pdf [file c7ce02026k1.pdf]

## Supplementary Material

### Preparation, Crystal Structure and Solution-Mediated Phase Transformation of a Novel Solid-State Form of CL-20

Bochen Pan,<sup>a</sup> Leping Dang,<sup>\*a</sup> Zhazhong Wang,<sup>\*a</sup> Jun Jiang<sup>a</sup> and Hongyuan Wei<sup>a</sup>

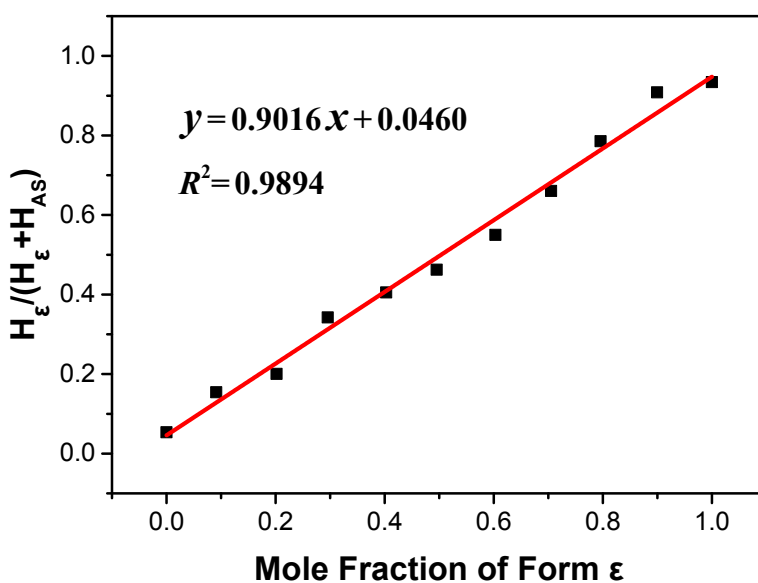

**Fig. S1** Calibration curve of the Raman spectra. The  $H_{\epsilon}$  and  $H_{AS}$  refer to the heights of the characteristic peak heights for form  $\epsilon$  and acetonitrile solvate, respectively.

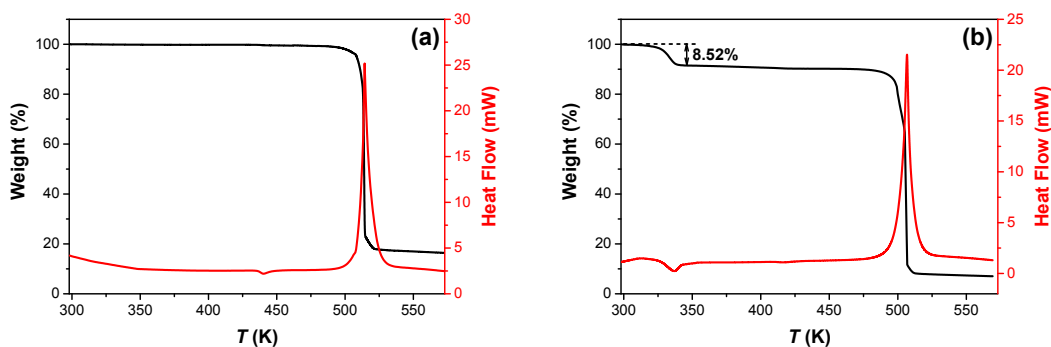

**Fig. S2** The TGA/DSC curves of (a) form  $\epsilon$  and (b) acetonitrile solvate.

<sup>a</sup> School of Chemical Engineering and Technology, Tianjin University, Tianjin 300072, P.R. China. E-mail address: [dangleping@tju.edu.cn](mailto:dangleping@tju.edu.cn), [wzz7698@tju.edu.cn](mailto:wzz7698@tju.edu.cn)

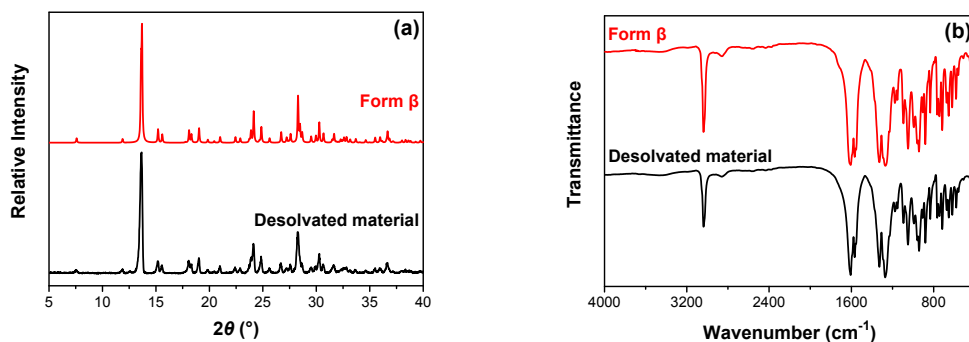

**Fig. S3** The (a) PXRD patterns and (b) FTIR spectra of the desolvated material and form  $\beta$ .

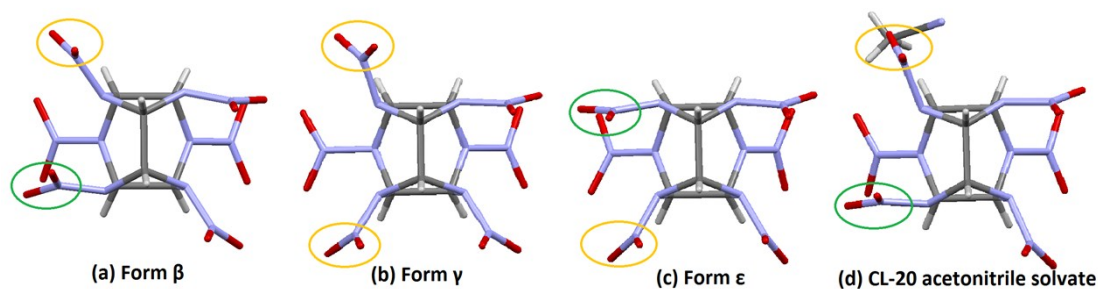

**Fig. S4** Molecular conformations of (a) form  $\beta$ , (b) form  $\gamma$ , (c) form  $\epsilon$ , and (d) acetonitrile solvate. Gray, white, red, and blue represent C, H, O, and N atoms, respectively. Orange and green circles represent the axial and equatorial orientations of  $\text{NO}_2$  groups, respectively.

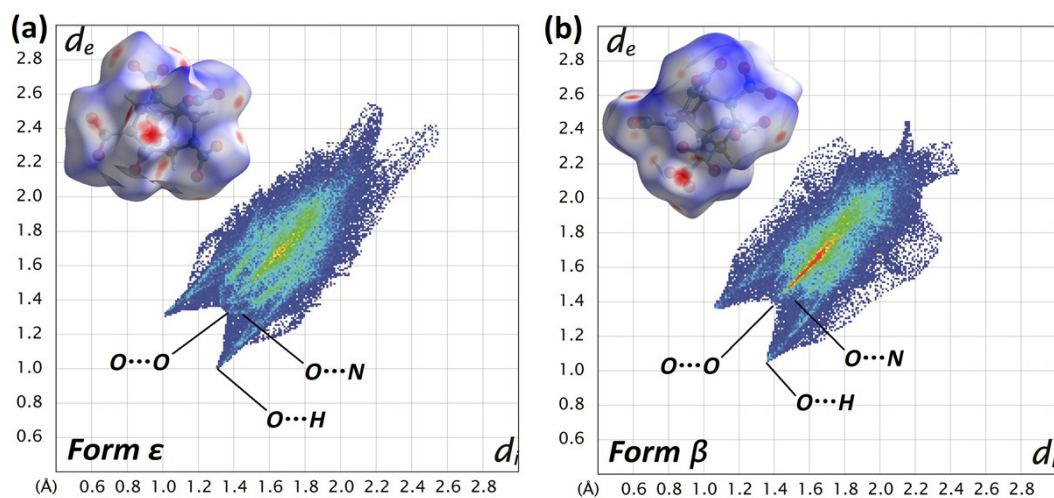

**Fig. S5** The Hirshfeld surfaces mapped with  $d_{norm}$  and the 2D fingerprint plots for (a) form  $\epsilon$  and (b) form  $\beta$ , respectively.

**Table S1** Experimental mole fraction solubility data of acetonitrile solvate ( $x_{AS}$ ) and form  $\epsilon$  ( $x_e$ ) in acetonitrile-chloroform mixed solvents with different mole fractions of acetonitrile ( $x_A$ ).

| Mole Fraction<br>of Acetonitrile | Acetonitrile Solvate |         |          | Form $\epsilon$ |         |          |
|----------------------------------|----------------------|---------|----------|-----------------|---------|----------|
|                                  | $x_{AS}$             | Average | Standard | $x_e$           | Average | Standard |

| $x_A$ | value   |         | Deviation |         | value   |         | Deviation |  |
|-------|---------|---------|-----------|---------|---------|---------|-----------|--|
|       | 0.00120 |         |           | 0.00037 |         |         |           |  |
| 0.150 | 0.00101 | 0.00110 | 0.00009   | 0.00041 | 0.00040 | 0.00003 |           |  |
|       | 0.00108 |         |           | 0.00043 |         |         |           |  |
|       | 0.00126 |         |           | 0.00054 |         |         |           |  |
| 0.175 | 0.00112 | 0.00120 | 0.00007   | 0.00052 | 0.00051 | 0.00002 |           |  |
|       | 0.00123 |         |           | 0.00049 |         |         |           |  |
|       | 0.00138 |         |           | 0.00063 |         |         |           |  |
| 0.200 | 0.00139 | 0.00135 | 0.00006   | 0.00065 | 0.00065 | 0.00003 |           |  |
|       | 0.00129 |         |           | 0.00068 |         |         |           |  |
|       | 0.00144 |         |           | 0.00089 |         |         |           |  |
| 0.225 | 0.00159 | 0.00152 | 0.00007   | 0.00087 | 0.00090 | 0.00004 |           |  |
|       | 0.00152 |         |           | 0.00094 |         |         |           |  |
|       | 0.00183 |         |           | 0.00121 |         |         |           |  |
| 0.250 | 0.00174 | 0.00179 | 0.00005   | 0.00124 | 0.00125 | 0.00004 |           |  |
|       | 0.00180 |         |           | 0.00129 |         |         |           |  |

**Table S2** Experimental mole fraction solubility data of acetonitrile solvate ( $x_{AS}$ ) and form  $\varepsilon$  ( $x_\varepsilon$ ) in acetonitrile-chloroform mixed solvent ( $x_A=0.20$ ) under different temperatures.

| Temperature/K | Acetonitrile Solvate |               |                    | Form $\varepsilon$ |               |                    |
|---------------|----------------------|---------------|--------------------|--------------------|---------------|--------------------|
|               | $x_{AS}$             | Average value | Standard Deviation | $x_\varepsilon$    | Average value | Standard Deviation |
|               | 0.00131              |               |                    | 0.00063            |               |                    |
| 298.15        | 0.00121              | 0.00126       | 0.00005            | 0.00061            | 0.00060       | 0.00003            |
|               | 0.00127              |               |                    | 0.00057            |               |                    |
|               | 0.00142              |               |                    | 0.00063            |               |                    |
| 303.15        | 0.00143              | 0.00139       | 0.00006            | 0.00065            | 0.00065       | 0.00003            |
|               | 0.00132              |               |                    | 0.00068            |               |                    |
|               | 0.00158              |               |                    | 0.00067            |               |                    |
| 308.15        | 0.00152              | 0.00157       | 0.00005            | 0.00073            | 0.00071       | 0.00004            |
|               | 0.00162              |               |                    | 0.00075            |               |                    |
|               | 0.00172              |               |                    | 0.00075            |               |                    |
| 313.15        | 0.00177              | 0.00179       | 0.00008            | 0.00079            | 0.00079       | 0.00004            |

|        |         |         |         |         |         |         |
|--------|---------|---------|---------|---------|---------|---------|
|        | 0.00188 |         | 0.00082 |         |         |         |
|        | 0.00209 |         | 0.00095 |         |         |         |
| 318.15 | 0.00221 | 0.00216 | 0.00007 | 0.00092 | 0.00093 | 0.00002 |
|        | 0.00219 |         | 0.00091 |         |         |         |

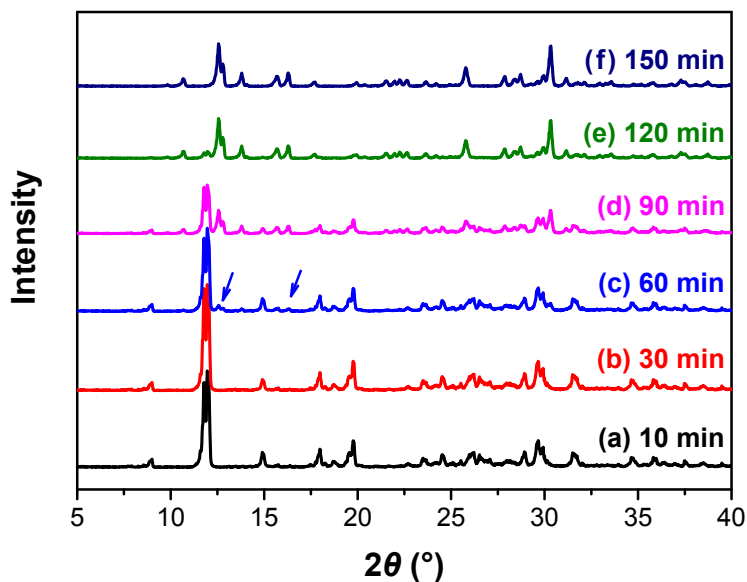

Fig. S6 Variation of the PXRD patterns during the SMPT process: (a) 10 min; (b) 30 min; (c) 60 min; (d) 90 min; (e) 120 min, and (f) 150 min.

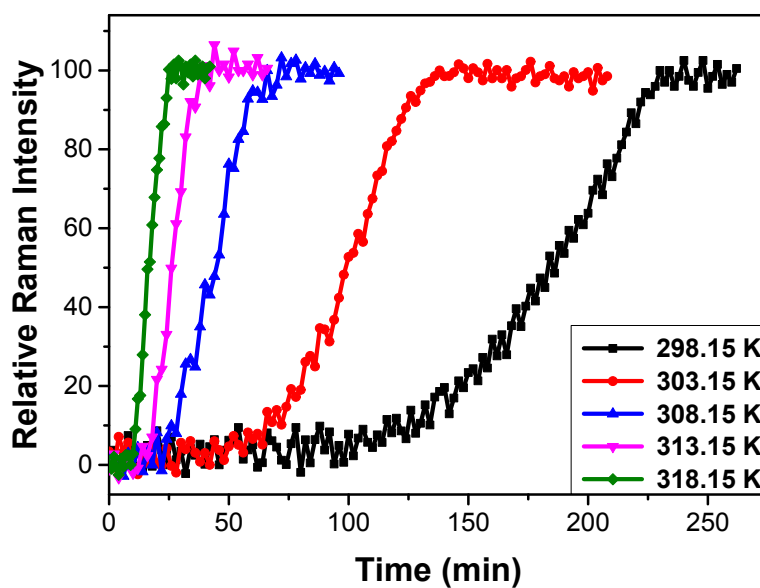

Fig. S7 Profiles of the SMPT process at different temperatures, in terms of the relative Raman intensity of form  $\epsilon$ .

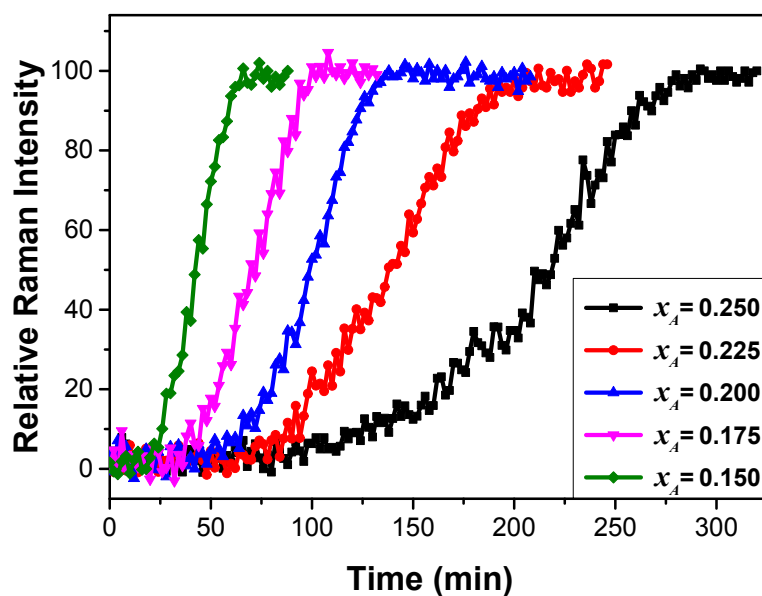

**Fig. S8** Profiles of the SMPT process with different contents of acetonitrile, in terms of the relative Raman intensity of form  $\epsilon$ .

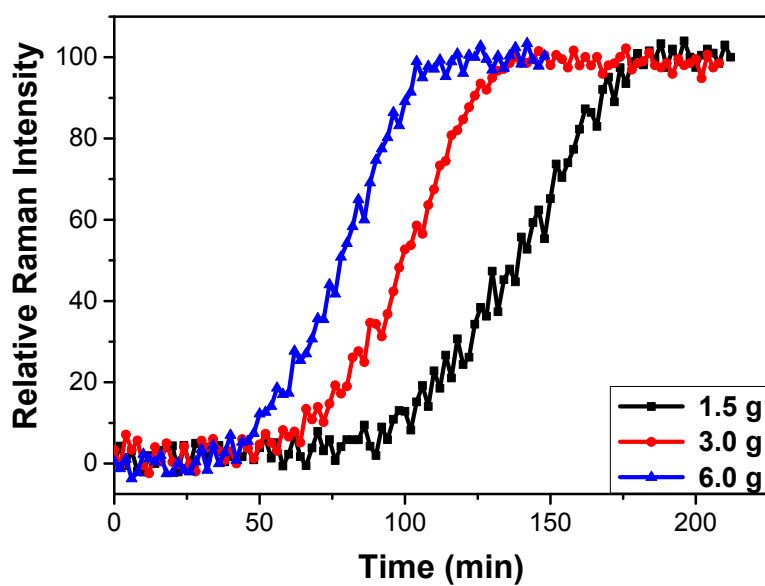

**Fig. S9** Profiles of the SMPT process with different solid loadings, in terms of the relative Raman intensity of form  $\epsilon$ .

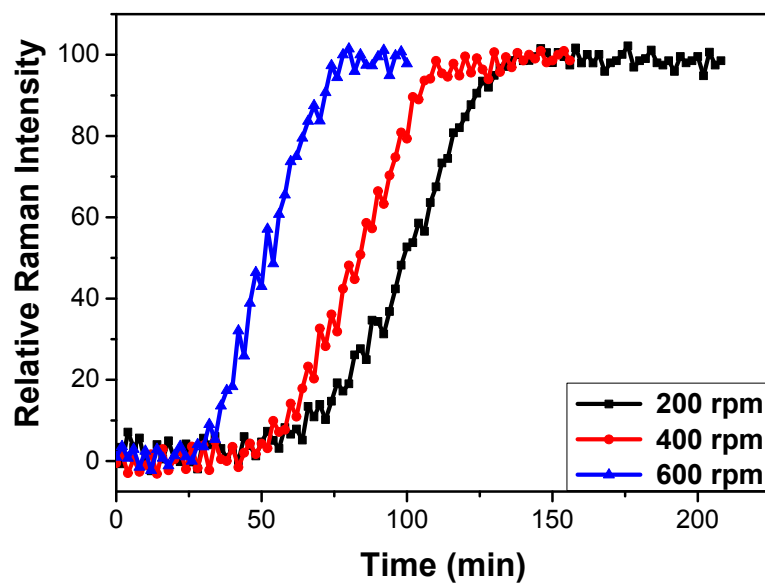

**Fig. S10** Profiles of the SMPT process under different agitation rates, in terms of the relative Raman intensity of form  $\epsilon$ .
